# Supplementary material for: Factors Associated With Discharge Planning Practices for Patients Receiving Inpatient Psychiatric Care
Source: Atypon-hosted journal article supplement (doi:10.1176/appi.ps.202000021), 2021-03-04
Supplement: ps202000021_ds1.pdf [file ps202000021_ds1.pdf]

## Supplemental data

### Consort diagram depicting creation of study sample.

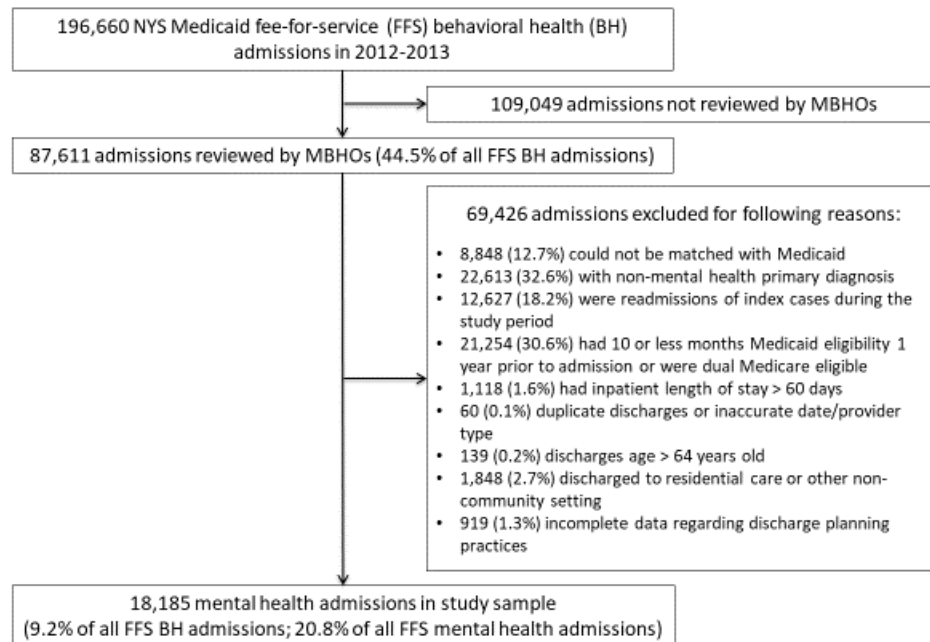

Inpatient staff scheduled outpatient appointments for 79.8% of discharges (14,503 out of 18,185 cases with complete information), forwarded a discharge summary to an outpatient provider within 1 day of discharge for 72.8% (13,735 out of 18,867 cases), and communicated with outpatient clinicians for 64.9% (12,099 out of 18,653 cases). All three discharge planning practices were completed for 46.3% (8,185 out of 17,668 cases). The findings reveal significant gaps in psychiatric inpatient discharge planning. Approximately 20% to 35% of discharged patients did not receive at least one of these recommended practices and over 50% failed to receive all 3 practices.

The models reported below identify patients at risk of not receiving all three discharge planning practices.

Supplemental Table 1 shows percentages of patients not receiving complete discharge planning stratified by patient characteristics. In the adjusted logistic regression model, patient characteristics associated with not receiving complete discharge planning included having short ( $\leq 4$  days) or long (31-60 days) inpatient lengths of stay, with a similar tendency for intermediate length of stay (15-30 days,  $p=.04$ ). Patients with a primary diagnosis of bipolar disorder were less likely to receive complete discharge planning with a similar tendency for patients with depressive disorders ( $p=.02$ ). Other significant variables included homelessness, co-occurring substance use, high medical co-morbidity (Elixhauser score 4 or greater), and lack of participation in outpatient care in the 12 months prior to admission.

Supplemental Table 2 reports associations between not receiving complete discharge planning and hospital and service system characteristics. In the adjusted logistic regression model, patients treated in medium or large hospitals were more likely to not receive complete discharge planning. Other hospital and service system variables that tended to associate with not receiving complete discharge planning included being treated in hospitals with a higher percentages of psychiatric discharges having Medicaid ( $p=.03$ ), hospitals

that did not provide outpatient psychiatric services ( $p=.02$ ), or teaching hospitals ( $p=.04$ ). Patients reviewed by the MBHOs in New York City area also tended to be more likely to not receive complete discharge planning (Hudson River,  $p=.03$ ; New York City,  $p=.04$ ; Long Island,  $p=.04$ ).



|                                                                    |       |       |      |      |               |      |               |       |
|--------------------------------------------------------------------|-------|-------|------|------|---------------|------|---------------|-------|
| <b>previous 12 months<br/>(non-behavioral<br/>health)</b>          |       |       |      |      |               |      |               |       |
| 0                                                                  | 5809  | 3040  | 52.3 | ref  |               | ref  |               |       |
| 1-3                                                                | 8408  | 4498  | 53.5 | 1.05 | (.91 - 1.2)   | 1.06 | (.96 - 1.17)  | .10   |
| 4 or higher                                                        | 3274  | 1837  | 56.1 | 1.16 | (.96 - 1.42)  | 1.15 | (1 - 1.31)    | .009  |
| <b>Prior engagement in<br/>psychiatric<br/>outpatient services</b> |       |       |      |      |               |      |               |       |
| Active (past<br>month)                                             | 8,855 | 4,143 | 46.8 | ref  |               | ref  |               |       |
| Recent (past 12<br>months, but not<br>past month)                  | 3,727 | 1,957 | 52.5 | 1.26 | (1.00 - 1.58) | 1.19 | (.94 - 1.49)  | .06   |
| None (none in<br>past 12 months)                                   | 5,086 | 3,383 | 66.5 | 2.26 | (1.87 - 2.73) | 2.26 | (1.91 - 2.68) | <.001 |



|                                                 |       |       |       |      |               |      |               |        |
|-------------------------------------------------|-------|-------|-------|------|---------------|------|---------------|--------|
| Western                                         | 2,545 | 1,051 | 41.3  | ref  |               | ref  |               |        |
| Central                                         | 2,534 | 1,076 | 42.5  | 1.05 | (.46 - 2.39)  | .84  | (.36 - 1.97)  | .60    |
| Hudson River                                    | 4,594 | 2,703 | 58.8  | 2.03 | (1.16 - 3.56) | 2.13 | (.88 - 5.15)  | .03    |
| NYC                                             | 6,736 | 3,980 | 59.1  | 2.05 | (1.12 - 3.77) | 1.94 | (.86 - 4.38)  | .04    |
| Long Island                                     | 1,259 | 673   | 53.5  | 1.63 | (.92 - 2.88)  | 1.91 | (.87 - 4.22)  | .04    |
| <b>County population in poverty</b>             |       |       |       |      |               |      |               |        |
| Low: less than 15%                              | 5549  | 2975  | 53.61 | ref  |               | ref  |               |        |
| Medium: 15-19%                                  | 6715  | 3532  | 52.60 | 0.96 | (0.69 - 1.33) | 1.22 | (0.9 - 1.66)  | 0.0923 |
| High: 20% or higher                             | 5241  | 2871  | 54.78 | 1.05 | (0.75 - 1.47) | 0.87 | (0.58 - 1.31) | 0.3805 |
| <b>Mental health workers per 100k residents</b> |       |       |       |      |               |      |               |        |
| Low: less than 67 (Q1)                          | 1385  | 650   | 46.93 | ref  |               | ref  |               |        |
| Medium: 67 to 166                               | 10045 | 5347  | 53.23 | 1.29 | (0.86 - 1.92) | 0.95 | (0.6 - 1.52)  | 0.7955 |
| High: 167 or more (Q3)                          | 6075  | 3381  | 55.65 | 1.42 | (0.95 - 2.13) | 0.76 | (0.47 - 1.22) | 0.1306 |
| <b>Urban/rural classification</b>               |       |       |       |      |               |      |               |        |
| Medium metro                                    | 2,128 | 1,111 | 52.2  | ref  |               | ref  |               |        |
| Large central metro                             | 9,622 | 5,308 | 55.2  | 1.13 | (.68 - 1.85)  | .61  | (.32 - 1.17)  | .05    |
| Large fringe metro                              | 2,862 | 1,615 | 56.4  | 1.19 | (.73 - 1.92)  | .89  | (.54 - 1.48)  | .55    |
| Small metro                                     | 1,051 | 556   | 52.9  | 1.03 | (.53 - 2.01)  | .94  | (.57 - 1.54)  | .74    |
| Micropolitan                                    | 1,432 | 592   | 41.34 | .65  | (.34 - 1.22)  | .85  | (.51 - 1.44)  | .43    |
| Noncore                                         | 410   | 196   | 47.8  | .84  | (.46 - 1.54)  | .78  | (.42 - 1.43)  | .29    |
